# Supplementary material for: AAV9 Targets Cone Photoreceptors in the Nonhuman Primate Retina
Source: PubMed Central journal article supplement (PMC3559681; doi:10.1371/journal.pone.0053463), 2013-01-30
Supplement: pone.0053463.s001.pdf [file pone.0053463.s001.pdf]

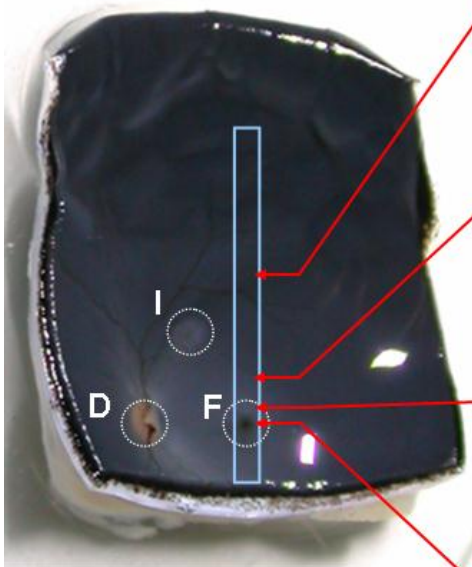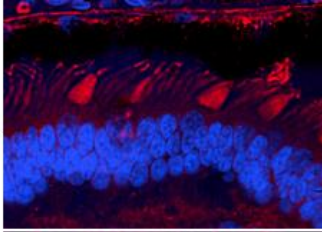

**Periphery**

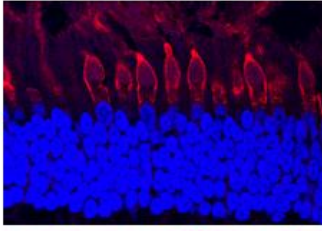

**Perifovea**

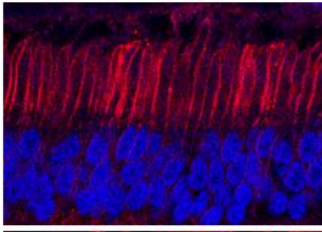

**Parafovea**

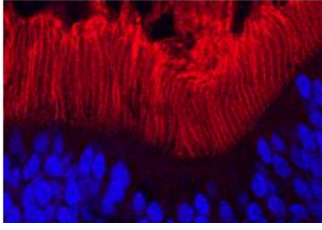

**Foveola/Fovea**
